1

2

3

4

## 5 **Acute mental health responses during the COVID-19 pandemic in Australia**

6

7 Authors:

8 Jill M. Newby PhD<sup>1,2</sup>, Kathleen O'Moore<sup>2</sup> DCP/MSc, Samantha Tang<sup>2</sup> PhD, Helen Christensen<sup>2</sup>, PhD, &

9 Kate Faasse PhD<sup>1</sup>

10 <sup>1</sup>School of Psychology, UNSW Sydney, NSW, Australia

11 <sup>2</sup>Black Dog Institute, UNSW Sydney, NSW, Australia

12

13

14

### 15 **Funding**

16 JN is supported by a MRFF Career Development Fellowship.

17

18

## Abstract

19

20

21

22

23

24

25

26

27

28

29

30

31

32

33

34

35

36

37

38

39

40

The acute and long-term mental health impacts of the COVID-19 pandemic are unknown. The current study examined the acute mental health responses to the COVID-19 pandemic in 5070 adult participants in Australia, using an online survey administered during the peak of the outbreak in Australia (27<sup>th</sup> March to 7<sup>th</sup> April 2020). Self-report questionnaires examined COVID-19 fears and behavioural responses to COVID-19, as well as the severity of psychological distress (depression, anxiety and stress), health anxiety, contamination fears, alcohol use, and physical activity. 78% of respondents reported that their mental health had worsened since the outbreak, one quarter (25.9%) were very or extremely worried about contracting COVID-19, and half (52.7%) were worried about family and friends contracting COVID-19. Uncertainty, loneliness and financial worries (50%) were common. Rates of elevated psychological distress were higher than expected, with 62%, 50%, and 64% of respondents reporting elevated depression, anxiety and stress levels respectively, and one in four reporting elevated health anxiety in the past week. Participants with self-reported history of a mental health diagnosis had significantly higher distress, health anxiety, and COVID-19 fears than those without a prior mental health diagnosis. Demographic (e.g., non-binary or different gender identity; Aboriginal and Torres Strait Islander status), occupational (e.g., being a carer or stay at home parent), and psychological (e.g., perceived risk of contracting COVID-19) factors were associated with distress. Results revealed that precautionary behaviours (e.g., washing hands, using hand sanitiser, avoiding social events) were common, although in contrast to previous research, higher engagement in hygiene behaviours was associated with higher stress and anxiety levels. These results highlight the serious acute impact of COVID-19 on the mental health of respondents, and the need for proactive, accessible digital mental health services to address these mental health needs, particularly for those most vulnerable, including people with prior history of mental health problems. Longitudinal research is needed to explore long-term predictors of poor mental health from the COVID-19 pandemic.

11 The novel Coronavirus (COVID-19) first emerged in Wuhan, China in December 2019, and has  
12 since evolved into a global pandemic. As of April 27<sup>th</sup> 2020, there are more than 2.87 million confirmed  
13 cases and 198,668 deaths globally with 6,720 confirmed cases, and 83 deaths from COVID-19 in Australia  
14 [1]. The COVID-19 pandemic has caused unprecedented disruption to the way most people live, work,  
15 study, socialise, and access health care; with widespread travel bans, border closures, lockdowns, social  
16 distancing, isolation and quarantine measures enforced by many countries. These changes and their  
17 ramifications (e.g., unemployment, social isolation), along with fears of COVID-19 are likely to have  
18 significant and long-term impacts on the mental health of the community. Research into past pandemics,  
19 such as the 2003 outbreak of Severe Acute Respiratory Syndrome (SARS), has shown higher rates of illness  
20 fears, psychological distress (e.g., depression, anxiety, stress), insomnia and other mental health problems  
21 (e.g., posttraumatic stress) in people with pre-existing mental illness, front-line health care workers [2], and  
22 survivors of severe and life-threatening cases of the disease [3-6].

23 High quality research into the mental health impacts of COVID-19 is urgently needed [7] to inform  
24 evidence-based policy decisions, prevention efforts, treatment programs and community support systems,  
25 particularly for those who are most vulnerable and those who are at risk of experiencing poor mental health  
26 outcomes during and after this pandemic. In marked contrast to the rapidly growing literature into the  
27 physical health consequences of COVID-19, there is currently limited information about the mental health  
28 impacts of the COVID-19 outbreak in the general population. However, some recent research has emerged  
29 from China with community participants [8-10], and health care worker samples [11]. In a cross-sectional  
30 survey of 52,730 participants in China conducted between the 31<sup>st</sup> January to the 10<sup>th</sup> February 2020 [10],  
31 29.3% of respondents experienced mild to moderate psychological distress, and 5.1% experienced severe  
32 distress. In another survey of 1210 members of the general public (half of whom were students) conducted  
33 between 31<sup>st</sup> January to 2<sup>nd</sup> February 2020, Wang et al. [8] found that over half (53.8%) of participants rated  
34 the psychological impact of the COVID-19 outbreak as moderate to severe, three quarters were worried  
35 about their family members contracting COVID-19, and rates of moderate to severe depression, anxiety and  
36 stress were 16.5%, 28.8%, and 8.1% respectively. In a follow-up survey four weeks later, rates of  
37 depression, anxiety and stress remained unchanged [12]. In another survey of 7236 self-selected volunteers

58 from 3<sup>rd</sup> to 17<sup>th</sup> February 2020, Huang & Zhao [13] found that 20.1%, 35.1%, and 18.2% of respondents  
59 reported symptoms of depression, generalised anxiety disorder (GAD), and insomnia on self-report  
60 measures.

61 Together these studies demonstrate the elevated psychological distress in the general community  
62 during the initial COVID-19 outbreak in China. These studies also give some early insights into factors that  
63 may increase a person's vulnerability to experiencing poor mental health during the pandemic. Preliminary  
64 evidence suggests that i) demographic factors (younger participants, females, college students, and those  
65 with low educational attainment), ii) occupational factors (migrant workers, nurses), iii) health-related  
66 factors (history of chronic illness, poor self-rated health [8]), and iv) greater exposure to COVID-19 and the  
67 worst affected regions of the outbreak [10], are associated with higher distress levels. In contrast, engaging  
68 in precautionary behaviours (e.g., hand hygiene, wearing a mask) have been associated with lower distress  
69 [8, 12]. As COVID-19 has spread to communities outside of China, more research is urgently needed to  
70 explore the mental health impacts of the outbreak, and to identify groups who are vulnerable to poorer  
71 mental health in other countries.

72 To our knowledge there are no published findings on the mental health of the general community  
73 during the COVID-19 pandemic in Australia. However, we conducted a previous online survey of the  
74 knowledge, attitudes, behaviours and risk perceptions of 2174 people from the general community, shortly  
75 after the first death occurred from COVID-19 and when confirmed COVID-19 cases were low in Australia  
76 (March 2<sup>nd</sup> -9<sup>th</sup> 2020) [14]. In that study, we found one in three participants were very or extremely  
77 concerned about an outbreak, and that participants perceived their risk of personally contracting COVID-19  
78 as relatively high (rated as 70% likelihood of contracting the virus). Moreover, most participants (61%)  
79 expected that they would experience moderate to severe symptoms of COVID-19 if they contracted the  
80 virus. We did not measure mental health outcomes, or how afraid individuals were of personally contracting  
81 COVID-19. Therefore, the current study extended our previous survey and investigated the mental health of  
82 Australian residents during a 12-day period from 27<sup>th</sup> March to 7<sup>th</sup> April 2020, which is now considered to  
83 be the time of the peak in new cases, and the steady decline in new cases. Three days prior to recruitment, an  
84 international travel ban had been implemented in Australia, and from 28<sup>th</sup> March 2020, all travellers arriving

15 in Australia from overseas were required to undergo a mandatory 14-day quarantine in designated  
16 accommodation. On the first day (27<sup>th</sup> March) of the study recruitment period, there was a total of 3378  
17 confirmed cases and 13 deaths related to COVID-19 in Australia, with 328 new cases diagnosed on the 27<sup>th</sup>  
18 March. Over the next two days, there was an increase of 785 new cases in Australia. Finally, over the  
19 remaining days of the study, the number of daily new cases steadily declined, with 93 new cases reported on  
20 the last day of recruitment (7<sup>th</sup> April 2020). There was a total of 5988 confirmed cases (including 3392  
21 active cases) and 49 deaths at the end of the survey period.

22 Drawing from past research [8, 10, 12] we assessed demographic characteristics, fears of COVID-19,  
23 risk perceptions and behavioural responses to the outbreak, psychological distress (depression, anxiety,  
24 stress), and alcohol use. We included measures of health anxiety and contamination fears due to their  
25 potential role in influencing behaviour, health service use, and anxious reactions to viral outbreaks [15-18],  
26 as well as physical activity levels, and loneliness, due to the expected negative impacts of social distancing  
27 measures on these variables, and due to their important role in mental and physical health [19, 20]. Finally,  
28 we assessed financial worries, as we expected unemployment, and financial insecurity, which have already  
29 resulted from this outbreak, to have significant, negative impacts on mental health [7, 21]. Our primary aim  
30 was to provide the first snapshot of the mental health of the general community during the initial COVID-19  
31 outbreak (and enforcement of social distancing laws) in Australia. The second aim was to explore the  
32 relationship between specific demographic and sample characteristics with depression, anxiety and stress, to  
33 identify factors that are associated with increased vulnerability for poorer mental health during the COVID-  
34 19 pandemic. While we acknowledge that the data from an online survey may not be representative of the  
35 entire population, they provide an important opportunity to (i) identify vulnerable groups who are risk of  
36 poorer mental health during COVID-19, (ii) determine the socio-demographic and psychological factors that  
37 predict psychological distress, and (iii) examine whether the findings from past pandemics, and from China,  
38 apply to the Australian context during the COVID-19 pandemic. Based on research from past pandemics,  
39 and Chinese research, we expected that between 20-35% would worry about contracting COVID-19 and  
40 experience elevated psychological distress, and that specific demographic variables including younger age,  
41 being a student, unemployed, female, or with lower educational attainment would predict higher distress

22 levels in the current cohort. We also expected people with lived experience of prior mental health diagnoses  
23 would have higher rates of distress and would be vulnerable to poorer mental health during the current  
24 pandemic. Finally, we predicted that engaging in precautionary hygiene behaviours would be associated  
25 with lower distress.

## 26 **Methods**

### 27 **Recruitment**

28 Participants were recruited for the online survey via social media posts, with Facebook  
29 advertisements targeting all users with i) current country of residence as Australia, and ii) age listed as 18 or  
30 above. Data was collected for 12 days from Friday 27<sup>th</sup> March to April 7<sup>th</sup>, 2020. The survey was  
31 administered via the Qualtrics survey platform. Each response came from a unique IP address to minimise  
32 duplicate entries.

### 33 **Ethics approval and consent**

34 The study was approved by the UNSW Human Research Ethics Advisory Panel and the UNSW  
35 Human Research Ethics Committee (approval number 3330). All respondents provided electronic informed  
36 consent before participating.

### 37 **Participants**

38 In total, 5,971 people viewed the participant information page and consent form. Of these, 579 did  
39 not complete the consent form, and a further 323 completed only some of the survey questions before  
40 discontinuing. This resulted in a final sample of 5071 participants with sufficient data (>70% complete) to  
41 include in the analysis. The structured questionnaire took approximately 15 minutes to complete.

### 42 **Measures**

#### 43 *Demographics*

44 Information was collected on participants' age group, gender, ethnicity, Aboriginal and Torres Strait  
45 Islander status, their highest level of education, carer status (for children, and/or someone with a disability,  
46 illness or frail aged) and state of residence within Australia. We also assessed participants' employment

17 status (including whether they had recently lost their job due to COVID-19), the industry of their main job,  
18 and the frequency at which they had worked from home during the past week (*not at all, a little, sometimes,*  
19 *most of the time, all of the time*).

### 50 ***General Health and Mental Health***

51 Participants were asked whether they had a chronic illness (*Yes, No, Unsure, Prefer not to say*), and  
52 completed a single-item measure assessing their *self-rated health* (Idler & Benyamini, 1997), with responses  
53 on a 5-point scale from *Poor* to *Excellent*. Participants were asked whether they had ever been diagnosed  
54 with a mental health problem such as depression and anxiety (*Yes, No, Unsure, Prefer not to say*), and  
55 whether they were currently receiving treatment for a mental health problem including medications,  
56 counselling, or psychological therapy (*Yes, No, Unsure, Prefer not to say*).

### 57 ***Mental Health***

58 Participants were asked to complete single item measures of i) how lonely they were feeling, ii) how  
59 worried they were about their financial situation, and iii) how uncertain they were feeling about the future,  
60 on a 5-point scale (*not at all, a little, moderately, very, extremely*). They were then asked to rate how the  
61 COVID-19 outbreak had impacted their mental health. “*Since the COVID-19 outbreak, my mental health*  
62 *has been...*”, and choose between 5 response options: *A lot worse, A little worse, Stayed the same, A little*  
63 *better, A lot better*.

64 The survey included several validated self-report screening instruments including i) the 21-item  
65 Depression Anxiety Stress Scales [22], a validated measure of depression, anxiety and stress symptoms, ii)  
66 the Whiteley-6 [23] a brief validated measure of health anxiety severity, iii) the Contamination Obsessions  
67 and Washing Compulsions subscale of the revised version of Padua Inventory of Obsessions and  
68 Compulsion [24], and iv) a specific measure of behavioural responses to the pandemic based on our prior  
69 study [14], and past research investigating behavioural responses to pandemics [25, 26]. Finally, we assessed  
70 physical activity levels using the Physical Activity Vital Sign [27] which assessed i) the number of days in  
71 the past week they engaged in moderate to strenuous activity, and ii) the average number of minutes they  
72 exercised at this level, and screened for hazardous alcohol use using the Modified Alcohol Use Disorders

73 Identification Test [AUDIT-C; 28]. All questionnaire responses were anchored to the past week, except for  
74 the AUDIT-C (past month), and the Padua contamination subscale (general). The mental health and lifestyle  
75 questionnaires were administered in randomised in order to minimise responding biases.

### 76 ***COVID-19 Variables, Fears and Perceived Risk***

77 Participants were asked about their own COVID-19 status (*I have caught COVID-19 in the past and*  
78 *am now recovered, I currently have COVID-19 [confirmed with a diagnostic test], I suspect I have COVID-*  
79 *19, I do not have COVID-19 and have not experienced it, Unsure, or Other (open text)*). They also indicated  
30 whether they were in self isolation (*Yes – I am in voluntary self-isolation, Yes – I am in forced self-isolation,*  
31 *No*). Participants were also asked i) whether any of their family or friends had contracted COVID-19 (*Yes,*  
32 *No, Unsure*), and ii) how concerned or worried they were that their friends or family members would  
33 contract COVID-19 (*not at all, a little concerned, moderately concerned, very concerned, extremely*  
34 *concerned*).

35 Participants were asked five questions relating to their perceived risk from, and worry about,  
36 COVID-19. The first question assessed how concerned or worried respondents were about catching COVID-  
37 19 on a 5-point scale (*not at all concerned, a little concerned, moderately concerned, very concerned,*  
38 *extremely concerned*). They then rated how likely they thought it was that they would catch the virus on a  
39 visual analogue scale (VAS) from 0 (*not at all likely*) to 100 (*extremely likely*). They were asked how much  
40 they thought they could do personally to protect themselves from catching the virus (perceived behavioural  
41 control), on a 0 (*couldn't do anything*) to 100 (*could do a lot*) visual analogue scale. Perceived illness  
42 severity was assessed by asking respondents how severe they thought their symptoms would be if they did  
43 catch COVID-19 (response options were: *no symptoms, mild symptoms, moderate symptoms, severe*  
44 *symptoms, severe symptoms requiring hospitalisation, and severe symptoms leading to death*). Finally,  
45 participants were asked about how much information they had seen, read or heard about coronavirus  
46 (nothing at all, a little, a moderate amount, a lot).

### 47 ***Health-Protective Behaviours***



18 To assess social distancing, hygiene and buying behaviours, participants were asked whether they  
19 had engaged in a total of 16 behaviours during the previous week (see Table 2). Response options for each  
20 item were *not at all*, *a little*, *some of the time*, *most of the time*, *all of the time*, and *not applicable*. Items  
21 were generated based on our previous study of COVID-19 [14] and from previous research examining  
22 health-protective behaviours in response to influenza, SARS and Middle East Respiratory Syndrome  
23 (MERS) outbreaks [e.g., 26].

## 14 Results

### 15 Demographics

16 Demographic characteristics of the sample are depicted in Table 1. Overall, the sample was mostly female  
17 (86%), identified as being Caucasian (75%), mainly spoke English at home (91%), and ranged in age from  
18 18 to over 75. Participants were from various states and territories of Australia, with the majority living in  
19 the most populated states of New South Wales, Victoria or Queensland. Sixty five percent were working in a  
20 paid job, and approximately one third were carers (for children, or people with a disability, illness, or the  
21 elderly). Respondents' self-rated health was measured on a scale from poor (1) to excellent (5), with a mean  
22 of 3.0 ( $SD = 0.97$ ). The majority of participants rated their health as 'fair' (24.4%), 'good' (37.7%), or 'very  
23 good' (24.4%); relatively few participants rated their health as 'poor' (5.3%) or 'excellent' (5.3%).

### 14 Health-Related Information

15 Only eight participants (0.2%) reported that they themselves currently have or have had COVID-19, 9.2%  
16 were unsure, and 1.2% suspected they had COVID-19. Approximately 4.8% reported their family or friends  
17 had caught COVID-19, and 8.2% were unsure. Almost half (48.8%) reported being in voluntary self-  
18 isolation, 2.4% reported being in 'forced self-isolation' and 48.8% were not self-isolating.

**Table 1. Demographic characteristics of the sample**

| <b>Demographic Variables</b>                  | <b>N (%)</b> |
|-----------------------------------------------|--------------|
| <b>Gender</b>                                 |              |
| Male                                          | 656 (12.94)  |
| Female                                        | 4348 (85.78) |
| Non-binary                                    | 42 (0.83)    |
| Different identity                            | 8 (0.16)     |
| Prefer not to say                             | 15 (0.28)    |
| <b>State</b>                                  |              |
| New South Wales                               | 1669 (32.93) |
| Victoria                                      | 1236 (24.38) |
| Queensland                                    | 878 (17.32)  |
| South Australia                               | 407 (8.03)   |
| Western Australia                             | 490 (9.67)   |
| Tasmania                                      | 215 (4.24)   |
| Australian Capital Territory                  | 141 (2.78)   |
| Northern Territory                            | 31 (0.61)    |
| <b>Age Group</b>                              |              |
| 18-24                                         | 268 (5.29)   |
| 25-34                                         | 773 (15.25)  |
| 35-44                                         | 1016 (20.04) |
| 45-54                                         | 1190 (23.48) |
| 55-64                                         | 1207 (23.81) |
| 65-74                                         | 497 (9.80)   |
| 75+                                           | 51 (1.01)    |
| Not stated                                    | 67 (1.32)    |
| <b>Ethnicity</b>                              |              |
| Caucasian (White / European)                  | 3812 (75.20) |
| Aboriginal and/or Torres Strait Islander      | 77 (1.52)    |
| Asian                                         | 79 (1.56)    |
| Mixed ethnicity or other                      | 307 (6.06)   |
| Prefer not to say or missing                  | 794 (15.66)  |
| <b>Highest Education</b>                      |              |
| Less than High school (Year 12 or equivalent) | 275 (5.43)   |
| High school only: completed (Year 12)         | 419 (8.27)   |
| Certificate, or diploma                       | 1485 (29.30) |
| Bachelor's degree or higher                   | 2888 (56.97) |
| Not stated                                    | 2 (0.04)     |
| <b>English main language spoken at home</b>   |              |
| Yes                                           | 4628 (91.30) |
| <b>Employment (tick all that apply)</b>       |              |
| I am a permanent employee                     | 2194 (43.3)  |
| I am working on a fixed term contract         | 362 (7.1)    |
| I have a casual job                           | 432 (8.5)    |
| I am self-employed                            | 388 (7.7)    |
| I am an independent contractor                | 118 (2.3)    |
| I am an at home parent                        | 221 (4.4)    |
| I am a student                                | 395 (7.8)    |
| I am a carer                                  | 129 (2.5)    |
| I am retired                                  | 646 (12.7)   |

|                                                                |              |
|----------------------------------------------------------------|--------------|
| I am seeking work                                              | 203 (4.0)    |
| I am not working and on disability benefits                    | 258 (5.1)    |
| I am not working as I have lost my job due to COVID19          | 314 (6.2)    |
| I am not working for other reasons                             | 341 (6.7)    |
| <b>Industry of main job</b>                                    |              |
| Health care or social assistance                               | 1039 (32.2)  |
| Education and training                                         | 613 (19.0)   |
| Administration and social support                              | 168 (5.5)    |
| Professional, scientific and technical services                | 242 (7.5)    |
| Retail trade                                                   | 137 (4.2)    |
| Other                                                          | 1109 (31.6)  |
| <b>Carer status</b>                                            |              |
| Carer for children                                             | 1196 (23.6)  |
| Carer for person with disability, illness or who is frail aged | 772 (15.2)   |
| <b>Isolation</b>                                               |              |
| No                                                             | 2475 (48.8)  |
| Yes -voluntary self- isolation                                 | 2472 (48.8)  |
| Yes – forced self-isolation                                    | 120 (2.4)    |
| <b>COVID-19 diagnosis</b>                                      |              |
| No/Never                                                       | 4534 (89.4)  |
| Unsure/Other                                                   | 462 (9.2)    |
| Current diagnosis (confirmed with diagnostic test)             | 5 (0.10)     |
| Suspect I have COVID-19                                        | 63 (1.2)     |
| I have had COVID-19 in the past and now recovered              | 3 (0.10)     |
| <b>Family/friends diagnosed with COVID-19</b>                  |              |
| Yes                                                            | 242 (4.8)    |
| No                                                             | 4411 (87.0)  |
| Unsure                                                         | 414 (8.2)    |
| <b>Mental health diagnosis</b>                                 |              |
| Yes                                                            | 3581 (70.65) |
| No                                                             | 1351 (26.65) |
| Unsure                                                         | 99 (1.95)    |
| Prefer not to say                                              | 38 (0.75)    |
| <b>Current mental health treatment</b>                         |              |
| Yes                                                            | 2288 (45.14) |
| No                                                             | 2747 (54.19) |
| Unsure                                                         | 13 (0.26)    |
| Prefer not to say                                              | 21 (0.41)    |
| <b>Chronic illness</b>                                         |              |
| Yes                                                            | 1941 (38.29) |
| No                                                             | 2584 (50.98) |
| Unsure                                                         | 362 (7.14)   |
| Prefer not to say                                              | 34 (0.67)    |
| Missing                                                        | 148 (2.92)   |
| <b>Self-rated health<sup>a</sup></b>                           |              |
| Excellent                                                      | 269 (5.3)    |
| Very good                                                      | 1236 (24.4)  |
| Good                                                           | 1910 (37.7)  |
| Fair                                                           | 1235 (24.4)  |
| Poor                                                           | 270 (5.3)    |

Note. a.  $n=4920$

## 19 **COVID-19 Fears and Perceived Risk**

20 Level of concern and worry about the possibility of contracting COVID-19 was moderate ( $M = 2.84$ ,  
21  $SD = 1.07$ , range 1-5, where 1 = *not at all*, 5 = *extremely concerned*). A small proportion reported being '*not*  
22 *at all concerned*' (7.6%), 35% reported being '*a little*' concerned, 31.4% were '*moderately concerned*',  
23 17.2% were '*very concerned*', and 8.5% were '*extremely concerned*' about contracting COVID-19.  
24 Respondents' ratings of the perceived likelihood of contracting COVID-19 was moderate ( $M = 48.25$ ,  $SD =$   
25  $24.84$ ; scale from 0 to 100). Perceived behavioural control, or the belief that personal protective behaviours  
26 could help prevent infection, had a mean score of 71.64 ( $SD = 19.69$ ). With regard to perceived severity of  
27 symptoms if they caught coronavirus, only 0.3% of respondents indicated that they would experience no  
28 symptoms; with mild (19.6%) and moderate (43.9%) symptoms most commonly expected. However, one in  
29 three respondents perceived the illness severity to be high: with 20.1% indicating they thought they would  
30 experience severe symptoms, severe symptoms requiring hospitalisation (12.0%), or severe symptoms  
31 leading to death (4.1%). In terms of the amount of information participants had been exposed to about the  
32 coronavirus in the past week, most participants (75%) reported having '*a lot*' of exposure to information,  
33 21.6% reported a '*moderate amount*', whereas very few reported a little (3.3%) or no information at all  
34 (0.1%).

## 35 **COVID-19 Fears (Others)**

36 Participants' overall level of concern and worry about friends and loved ones contracting COVID-19 was  
37 moderate ( $M = 3.53$ ,  $SD = 1.03$ , range 1-5, where 1 = *not at all*, 5 = *extremely concerned*). A small  
38 proportion reported that they were '*not at all concerned*' (1.6%), 16.5% reported being '*a little*' concerned,  
39 29.2% were '*moderately concerned*', 33.1% were '*very concerned*', and 19.6% '*extremely concerned*' about  
40 their friends or family members contracting COVID-19.

## 41 **Health-Protective Behaviours**

42 The percentage of respondents who reported having engaged in a range of distancing and hygiene  
43 behaviours during the past week is presented in Table 2. During the previous week, handwashing and social  
44 distancing (avoiding social events and gatherings) were the most common behaviours.

Table 2. Frequency of health-protective behaviours during the past week

|                                                                                            | <b>N/A</b>   | <b>Not at all</b> | <b>A little</b> | <b>Some of the time</b> | <b>Most of the time</b> | <b>All of the time</b> |
|--------------------------------------------------------------------------------------------|--------------|-------------------|-----------------|-------------------------|-------------------------|------------------------|
| <b>Avoided going to work or university</b>                                                 | 1702 (33.58) | 1120 (22.10)      | 170 (3.35)      | 197 (3.89)              | 306 (6.04)              | 1567 (30.91)           |
| <b>Avoided using public transport</b>                                                      | 1828 (36.06) | 142 (2.80)        | 70 (1.38)       | 75 (1.48)               | 199 (3.93)              | 2748 (54.21)           |
| <b>Avoided flying domestically or internationally</b>                                      | 2323 (45.83) | 113 (2.23)        | 22 (0.43)       | 19 (0.37)               | 34 (0.67)               | 2549 (50.29)           |
| <b>Avoided social events or public gatherings</b>                                          | 234 (4.62)   | 47 (0.93)         | 58 (1.14)       | 62 (1.22)               | 492 (9.71)              | 4168 (82.23)           |
| <b>Avoiding socialising (in person) with anyone outside of your household</b>              | 82 (1.62)    | 90 (1.78)         | 170 (3.35)      | 225 (4.44)              | 1495 (29.49)            | 2997 (59.12)           |
| <b>Avoided going to hospitals or going to the doctor unless absolutely necessary</b>       | 1015 (20.02) | 280 (5.52)        | 167 (3.29)      | 155 (3.06)              | 561 (11.07)             | 2881 (56.84)           |
| <b>Avoided going into shops</b>                                                            | 35 (0.69)    | 275 (5.43)        | 493 (9.73)      | 1017 (20.06)            | 2533 (49.97)            | 706 (13.93)            |
| <b>Avoided staying in hotels, hostels, or Airbnb's</b>                                     | 2572 (50.74) | 108 (2.13)        | 13 (0.26)       | 14 (0.28)               | 37 (0.73)               | 2315 (45.67)           |
| <b>Avoided sending your children to school or childcare</b>                                | 3745 (73.88) | 217 (4.28)        | 42 (0.83)       | 67 (1.32)               | 123 (2.43)              | 865 (17.06)            |
| <b>Stayed at home as much as possible</b>                                                  | 38 (0.75)    | 31 (0.61)         | 56 (1.10)       | 219 (4.32)              | 2310 (45.57)            | 2406 (47.46)           |
| <b>Cleaned or disinfected things you touch (such as doorknobs or hard surfaces)</b>        | 31 (0.61)    | 592 (11.68)       | 697 (13.75)     | 1387 (27.36)            | 1390 (27.42)            | 964 (19.02)            |
| <b>Used sanitising hand gel to clean your hands</b>                                        | 92 (1.81)    | 441 (8.70)        | 428 (8.44)      | 1153 (22.75)            | 1286 (25.37)            | 1661 (32.77)           |
| <b>Washed your hands thoroughly</b>                                                        | 10 (0.20)    | 7 (0.14)          | 34 (0.67)       | 150 (2.96)              | 1382 (27.26)            | 3475 (68.55)           |
| <b>Worn a face mask when going out in public</b>                                           | 261 (5.15)   | 4067 (80.23)      | 193 (3.81)      | 223 (4.40)              | 148 (2.92)              | 169 (3.33)             |
| <b>Avoided touching objects or surfaces knowing they have been touched by other people</b> | 77 (1.52)    | 188 (3.71)        | 416 (8.21)      | 881 (17.38)             | 2005 (39.55)            | 1493 (29.45)           |
| <b>Purchased significantly more than you normally would when grocery shopping</b>          | 73 (1.44)    | 2008 (39.61)      | 1406 (27.74)    | 927 (18.29)             | 398 (7.85)              | 248 (4.89)             |

Note. Numbers represent n and proportion (%) in brackets.

## 15 Mental Health

16 More than three quarters of participants reported that their mental health had been worse since the  
17 outbreak, with 55.1% selecting 'a little worse', and 22.9% selecting 'a lot worse'. A small proportion  
18 reported improvements in their mental health since the outbreak (5.5%) (see Figure 1). A chi square analysis  
19 revealed that there was a significant difference in the impact of COVID-19 on mental health for participants  
20 with and without a prior mental health diagnosis ( $\chi^2(4) = 141.44, p < .001$ ), with 26.6% of those with a  
21 prior mental health diagnosis saying their mental health had been 'a lot worse', relative to 13.4% in the  
22 group without a mental health diagnosis.

### Since the outbreak, my mental health has been:

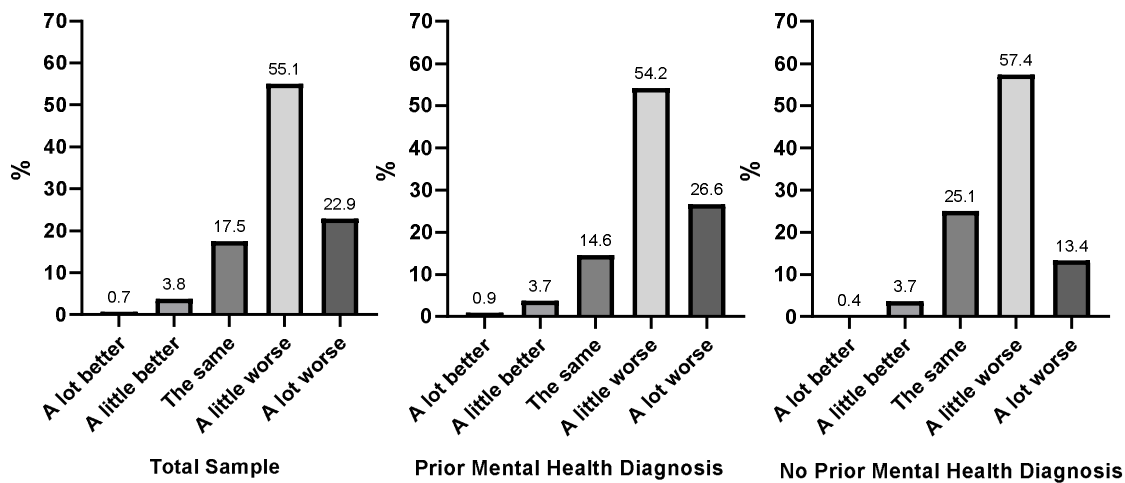

Figure 1. Proportion of participants reporting how their mental health has been since the start of the COVID-19 outbreak, in the Total Sample (Left), the sub-sample with a prior mental health diagnosis (middle) and no prior mental health diagnosis (right).

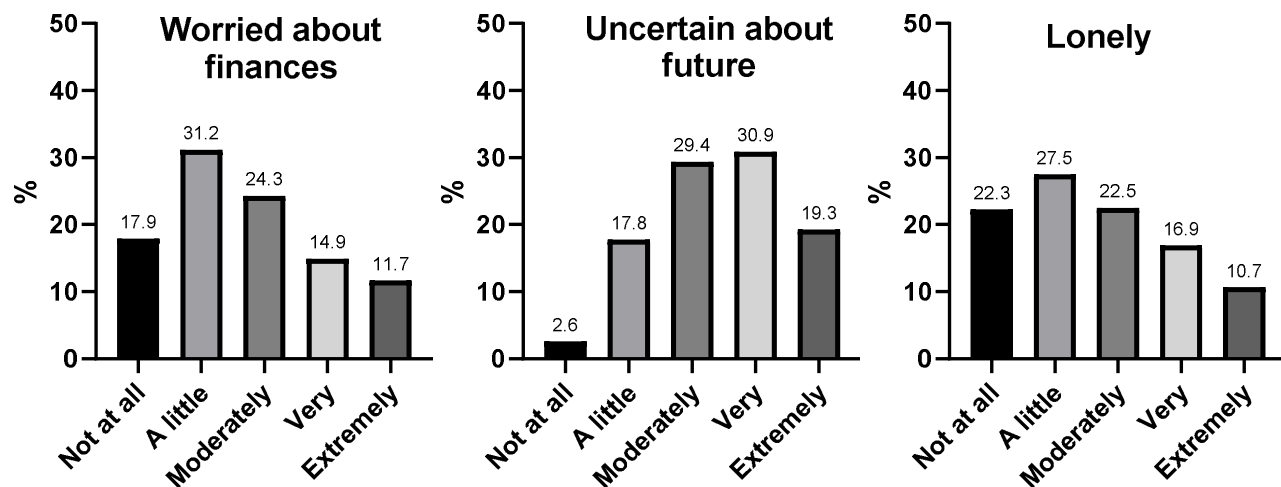

Figure 2. Proportion (% of total sample) of participants reporting worry about finances, uncertainty about the future and feelings of loneliness.

53 Almost 80% of individuals reported moderate to extreme levels of uncertainty about the future; half  
54 (50.1%) reported feeling moderately to extremely lonely, and half reported moderate to extreme worry about  
55 their financial situation (50.1%). See Figure 2 for results.

56 Table 3 shows the proportion of participants who scored across the severity categories of the DASS-  
57 21 subscales. Only 38.2% of respondents scored in the normal range for depression, 50.2% in the normal  
58 range for anxiety, and 45.5% for stress. In contrast, 37.1%, 29.1%, and 33.6% fell in the mild to moderate  
59 range for depression, anxiety, and stress respectively, whereas 24.1%, 20.3%, and 20.4% reported severe or  
60 extremely severe stress levels. On the Whiteley-6, 21.6% scored in the range indicating elevated health  
61 anxiety. Of the participants who had valid scores on the Physical Activity Vital Sign (N=4845), 42.7% met  
62 national guidelines for 150 minutes of moderate to vigorous physical activity in the past week. On the  
63 AUDIT-C brief screener for alcohol use, approximately 52.7% showed hazardous drinking levels.  
64 Hazardous drinking levels were defined as an AUDIT-C score of 3 or more for women and other genders,  
65 and 4 or more for men [28, 29].

Table 3. Psychological distress, health anxiety, alcohol use, and physical activity

|                                                               | <b>Normal</b> | <b>Mild</b> | <b>Moderate</b> | <b>Severe</b> | <b>Extremely Severe</b> |
|---------------------------------------------------------------|---------------|-------------|-----------------|---------------|-------------------------|
| <b>DASS-21</b>                                                | n (%)         | n (%)       | n (%)           | n (%)         | n (%)                   |
| <b>Depression Subscale</b>                                    | 1936 (38.19)  | 765 (15.09) | 1124 (22.17)    | 533 (10.51)   | 691 (13.63)             |
| <b>Anxiety Subscale</b>                                       | 2546 (50.23)  | 434 (8.56)  | 1039 (20.50)    | 397 (7.83)    | 633 (12.49)             |
| <b>Stress Subscale</b>                                        | 2308 (45.53)  | 778 (15.35) | 927 (18.29)     | 720 (14.20)   | 316 (6.23)              |
|                                                               | <b>M</b>      | <b>SD</b>   |                 |               |                         |
| <b>DASS-21 Total</b>                                          | 40.19         | 25.07       |                 |               |                         |
| <b>DASS-21 Depression Subscale</b>                            | 14.14         | 10.56       |                 |               |                         |
| <b>DASS-21 Anxiety Subscale</b>                               | 8.98          | 8.21        |                 |               |                         |
| <b>DASS-21 Stress Subscale</b>                                | 17.07         | 9.49        |                 |               |                         |
| <b>Whiteley-6 Total (Health Anxiety)</b>                      | 13.18         | 5.61        |                 |               |                         |
| <b>Padua Contamination &amp; Washing Subscale<sup>a</sup></b> | 10.76         | 8.78        |                 |               |                         |
| <b>Physical activity vital sign<sup>b</sup></b>               | 186.86        | 369.39      |                 |               |                         |
| <b>AUDIT-C (alcohol)<sup>c</sup></b>                          | 3.66          | 2.02        |                 |               |                         |

**Note.** DASS-21 = Depression Anxiety Stress 21-item scale. a. n=4928, b. n=4845. c. n=4828



56 **Comparison between people with and without prior mental health diagnosis**

57 People with and without a self-reported history of mental health diagnosis were compared in their severity of  
 58 COVID-19 fears, mental health, distress, health anxiety, alcohol use, contamination fears, and physical  
 59 activity. People with a previous self-reported mental health diagnosis reported higher uncertainty, loneliness,  
 70 financial worries, COVID-19 fears (self and others), believed they were more likely to contract COVID-19,  
 71 had lower perceived behavioural control, had higher rates of psychological distress, health anxiety and  
 72 contamination fears, and lower physical activity than those without a self-reported mental health diagnosis  
 73 history. There were no differences in alcohol use between these groups (see Table 4).

**Table 4. Mental health in people with and without a prior self-reported mental health diagnosis.**

|                                             | Prior mental health diagnosis |       |       | No prior mental health diagnosis |       |       |                                          |
|---------------------------------------------|-------------------------------|-------|-------|----------------------------------|-------|-------|------------------------------------------|
|                                             | N                             | Mean  | SD    | N                                | Mean  | SD    | Independent samples <i>t</i> test        |
| <b>Uncertain: future</b>                    | 3581                          | 3.57  | 1.07  | 1351                             | 3.21  | 1.05  | <i>t</i> (4930) = 10.63, <i>p</i> = 0.00 |
| <b>Lonely</b>                               | 3581                          | 2.83  | 1.29  | 1351                             | 2.23  | 1.16  | <i>t</i> (4930) = 14.89, <i>p</i> = 0.00 |
| <b>Worry: finances</b>                      | 3581                          | 2.83  | 1.26  | 1351                             | 2.41  | 1.19  | <i>t</i> (4930) = 10.68, <i>p</i> = 0.00 |
| <b>Worry: contracting COVID-19</b>          | 3574                          | 2.89  | 1.08  | 1344                             | 2.71  | 1.03  | <i>t</i> (4916) = 5.23, <i>p</i> = 0.00  |
| <b>Perceived likelihood</b>                 | 3575                          | 49.04 | 24.88 | 1347                             | 45.97 | 24.61 | <i>t</i> (4920) = 3.87, <i>p</i> = 0.00  |
| <b>Perceived control</b>                    | 3574                          | 71.05 | 19.79 | 1346                             | 73.41 | 19.25 | <i>t</i> (4918) = -3.76, <i>p</i> = 0.00 |
| <b>Severity of illness</b>                  | 3564                          | 3.44  | 1.07  | 1341                             | 3.16  | 1.02  | <i>t</i> (4903) = 8.39, <i>p</i> = 0.00  |
| <b>Worry: loved ones contracting COVID-</b> | 3581                          | 3.59  | 1.03  | 1351                             | 3.38  | 1.02  | <i>t</i> (4930) = 6.22, <i>p</i> = 0.00  |
| <b>Self-rated health</b>                    | 3481                          | 2.85  | 0.94  | 1310                             | 3.39  | 9.40  | <i>t</i> (4789) = 17.73, <i>p</i> = 0.00 |
| <b>DASS-21 Total</b>                        | 3567                          | 45.52 | 25.26 | 1345                             | 26.57 | 18.93 | <i>t</i> (4910) = 25.00, <i>p</i> = 0.00 |
| <b>DASS-21 Depression</b>                   | 3567                          | 16.22 | 10.85 | 1345                             | 8.87  | 7.70  | <i>t</i> (4910) = 22.78, <i>p</i> = 0.00 |
| <b>DASS-21 Anxiety</b>                      | 3567                          | 10.47 | 8.50  | 1345                             | 5.12  | 5.98  | <i>t</i> (4910) = 21.19, <i>p</i> = 0.00 |
| <b>DASS-21 Stress</b>                       | 3567                          | 18.83 | 9.44  | 1345                             | 12.58 | 8.12  | <i>t</i> (4910) = 21.49, <i>p</i> = 0.00 |

|                                             |      |          |          |          |          |        |                               |
|---------------------------------------------|------|----------|----------|----------|----------|--------|-------------------------------|
| <b>Whiteley-6 (health anxiety)</b>          | 3575 | 13.93    | 5.75     | 1351     | 11.19    | 4.74   | t (4924) = 15.63, p = 0.00    |
| <b>Contamination Fears</b>                  | 3483 | 11.42    | 9.05     | 1319     | 9.12     | 7.87   | t (4800) = 8.14, p = 0.00     |
| <b>AUDIT-C Total (alcohol)</b>              | 3411 | 3.10     | 2.72     | 1289     | 3.23     | 2.44   | t (4698) = -1.45, p = 0.15    |
| <b>PAVS Total (physical activity)</b>       | 3429 | 170.90   | 360.41   | 1289     | 226.32   | 393.88 | t (4716) = -4.59, p = 0.00    |
|                                             |      | <b>n</b> | <b>%</b> | <b>n</b> | <b>%</b> |        |                               |
| <b>Whiteley-6 (elevated health anxiety)</b> |      | 923      | 25.8     | 146      | 10.8     |        | $\chi^2 (1) = 130.03$ p <.001 |
| <b>AUDIT-C (hazardous drinking)</b>         |      | 1742     | 48.6     | 737      | 54.6     |        | $\chi^2 (1) = 52.52$ p <.001  |
| <b>PAVS (inactive)</b>                      |      | 1349     | 58.1     | 631      | 49.0     |        | $\chi^2 (1) = 13.99$ p <.001  |

74 **Impact of self-isolation:** Compared to people who were not in self isolation, people who self-reported being  
 75 in self-isolation reported higher uncertainty, loneliness, financial worries, and COVID-19 fears (self and  
 76 others), rated the symptoms of COVID-19 as more serious, but believed they were less likely to contract  
 77 COVID-19, and perceived more behavioural control over COVID-19. They also had higher rates of  
 78 psychological distress, health anxiety and contamination fears, and lower alcohol use than those not in  
 79 isolation. There were no differences in physical activity between these groups (see Table 5).

**Table 5. Comparison between those in self-isolation versus not in self isolation**

|                                    | Not in self-isolation |       |       | In self-isolation |       |       | Independent samples <i>t</i> test |
|------------------------------------|-----------------------|-------|-------|-------------------|-------|-------|-----------------------------------|
|                                    | N                     | M     | SD    | N                 | M     | SD    |                                   |
| <b>Uncertain: future</b>           | 2475                  | 3.41  | 1.06  | 2592              | 3.52  | 1.08  | t (5065) = 3.63, p = 0.00         |
| <b>Lonely</b>                      | 2475                  | 2.56  | 1.26  | 2592              | 2.76  | 1.29  | t (5065) = 5.52, p = 0.00         |
| <b>Worry: finances</b>             | 2475                  | 2.64  | 1.22  | 2592              | 2.78  | 1.27  | t (5065) = 4.09, p = 0.00         |
| <b>Worry: contracting COVID-19</b> | 2473                  | 2.77  | 1.05  | 2580              | 2.91  | 1.08  | t (5051) = 4.65, p = 0.00         |
| <b>Perceived likelihood</b>        | 2473                  | 49.27 | 25.26 | 2584              | 47.27 | 24.40 | t (5055) = -2.86, p = 0.00        |
| <b>Perceived control</b>           | 2473                  | 70.16 | 20.36 | 2582              | 73.06 | 18.93 | t (5053) = 5.26, p = 0.00         |
| <b>Severity of illness</b>         | 2467                  | 3.18  | 0.94  | 2573              | 3.53  | 1.14  | t (5038) = 11.95, p = 0.00        |

|                                             |      |        |        |      |        |        |                            |
|---------------------------------------------|------|--------|--------|------|--------|--------|----------------------------|
| <b>Worry: loved ones contracting COVID-</b> | 2475 | 3.44   | 1.04   | 2592 | 3.60   | 1.02   | t (5065) = 5.51, p = 0.00  |
| <b>Self-rated health</b>                    | 2339 | 3.10   | 0.94   | 2452 | 2.90   | 0.99   | t (4789) = 6.92, p = 0.00  |
| <b>DASS-21 Total</b>                        | 2461 | 38.05  | 24.44  | 2586 | 42.26  | 25.48  | t (5045) = 5.99, p = 0.00  |
| <b>DASS-21 Depression</b>                   | 2461 | 13.24  | 10.32  | 2586 | 15.01  | 10.72  | t (5045) = 5.97, p = 0.00  |
| <b>DASS-21 Anxiety</b>                      | 2461 | 8.15   | 7.85   | 2586 | 9.78   | 8.47   | t (5045) = 7.10, p = 0.00  |
| <b>DASS-21 Stress</b>                       | 2461 | 16.66  | 9.35   | 2586 | 17.47  | 9.60   | t (5045) = 3.03, p = 0.00  |
| <b>Whiteley-6 (health anxiety)</b>          | 2470 | 12.27  | 5.20   | 2591 | 14.06  | 5.85   | t (5059) = 11.52, p = 0.00 |
| <b>Contamination Fears</b>                  | 2414 | 9.92   | 8.30   | 2514 | 11.56  | 9.14   | t (4926) = 6.60, p = 0.00  |
| <b>AUDIT-C Total (alcohol)</b>              | 2358 | 3.25   | 2.63   | 2470 | 3.02   | 2.65   | t (4826) = -3.02, p = 0.00 |
| <b>PAVS Total (physical activity)</b>       | 2362 | 190.10 | 296.41 | 2483 | 183.77 | 427.44 | t (4843) = -0.60, p = 0.55 |

### 30 Predictors of Depression, Anxiety and Stress

31 Separate linear regression analyses were conducted to explore the demographic, occupational, and  
 32 psychological predictors of DASS-21 depression, anxiety and stress severity (see final model in Table 8).  
 33 We entered demographic predictor variables (gender, age, occupational status, education, Aboriginal and/or  
 34 Torres Strait Islander and carer status) in the first step. In the second step, we entered general health  
 35 variables including chronic illness, mental health diagnosis history, and self-rated health. In the third step,  
 36 we entered uncertainty about the future, loneliness, worry about finances. In the final step, we added  
 37 COVID-19 variables (whether they were in self-isolation, hygiene behaviours, exposure to COVID-19  
 38 information, risk perceptions including perceived likelihood, perceived control, and severity of illness,  
 39 concern/worry about contracting COVID-19, and concern/worry about loved ones contracting COVID-19.  
 40 **Depression.** Demographic variables accounted for 10.8% of the variance ( $R^2_{\text{change}}=0.11$ ,  $SE=10.02$ ,  $F_{\text{change}}$   
 41 (18, 4971), = 33.32,  $p < .001$ ). Entering the mental health diagnosis, chronic illness, and self-rated health  
 42 variables accounted for 9.5% of additional variance ( $R^2_{\text{change}}=0.095$ ,  $SE=9.47$ ,  $F_{\text{change}}$  (3, 4788), = 191.73,  $p$   
 43  $< .001$ ). In the third step, entering mental health variables accounted for 27.5% unique variance ( $R^2$

14  $\Delta R^2_{\text{change}}=0.28$ ,  $SE=7.66$ ,  $F_{\text{change}}(3, 4785) = 845.35$ ,  $p < .001$ ). Finally, the COVID-19 variables accounted for  
15 0.7% unique variance ( $R^2_{\text{change}}=0.007$ ,  $SE=7.61$ ,  $F_{\text{change}}(3, 4777) = 8.02$ ,  $p < .001$ ). The final model is  
16 presented in Table 8 and accounted for 48.5% of the variance in depression scores.

17 Controlling for the other variables in the model, being female, more well educated, older, and having better  
18 self-rated health were all associated with lower depression, whereas being unemployed, a student, retired,  
19 carer or stay at home parent were associated with higher depression. Mental health and chronic illness  
20 diagnoses were associated with higher depression, as were increased uncertainty about the future, loneliness,  
21 and financial worries. Of the COVID-19 variables, higher worry about COVID-19 and perceived  
22 behavioural control over COVID-19 infection were associated with lower depression, whereas perceiving  
23 higher illness severity was associated with higher depression.

24 **Anxiety.** In the first step, demographic variables accounted for 10.7% of the variance in anxiety scores ( $R^2_{\text{change}}=0.11$ ,  
25  $SE=7.77$ ,  $F_{\text{change}}(18, 4791) = 33.05$ ,  $p < .001$ ). Entering the health variables (mental health  
26 diagnosis, chronic illness, and self-rated health) accounted for 8.3% of additional variance ( $R^2_{\text{change}}=0.083$ ,  
27  $SE=7.40$ ,  $F_{\text{change}}(3, 4788) = 163.28$ ,  $p < .001$ ). In the third step, entering mental health variables accounted  
28 for 15.3% unique variance ( $R^2_{\text{change}}=0.15$ ,  $SE=6.67$ ,  $F_{\text{change}}(3, 4785) = 372.11$ ,  $p < .001$ ). Finally, the  
29 COVID-19 variables accounted for 2.7% unique variance ( $R^2_{\text{change}}=0.027$ ,  $SE=6.53$ ,  $F_{\text{change}}(3, 4777) =$   
30  $25.55$ ,  $p < .001$ ). The final model is presented in Table 8 and accounted for 36.5% of the variance in anxiety  
31 scores.

32 Controlling for other variables in the model, being female, non-binary or different gender identity, and being  
33 Aboriginal and/or Torres Strait Islander were predictors of higher anxiety. Older age, and more well  
34 educated (certificate, degree or higher) were predictors of lower anxiety. In contrast to depression, only  
35 being a student predicted worse anxiety. Having a chronic illness, and prior history of mental health  
36 diagnosis were associated with higher anxiety, whereas better self-rated health was a predictor of lower  
37 anxiety. Similar to depression, increased uncertainty about the future, loneliness, and financial worries were  
38 also associated with higher anxiety. Of the COVID-19 variables, more hygiene behaviours, worry about  
39 COVID-19, worry about loved ones contracting COVID-19, and higher perceived illness severity were

20 predictors of higher anxiety, whereas increased exposure to COVID-19 information, and perceived control  
21 over COVID-19 predicted lower anxiety.

22 **Stress.** In the first step, demographic variables accounted for 10.8% of the variance in anxiety scores ( $R^2$   
23  $\text{change}=0.11$ ,  $SE=8.99$ ,  $F_{\text{change}}(18, 4791) = 33.49$ ,  $p < .001$ ). Entering the health variables (mental health  
24 diagnosis, chronic illness, and self-rated health) accounted for 6.9% of additional variance ( $R^2_{\text{change}}=0.069$ ,  
25  $SE=8.63$ ,  $F_{\text{change}}(3, 4788) = 135.07$ ,  $p < .001$ ). In the third step, entering mental health variables accounted  
26 for 19.4% unique variance ( $R^2_{\text{change}}=0.19$ ,  $SE=7.54$ ,  $F_{\text{change}}(3, 4785) = 496.74$ ,  $p < .001$ ). Finally, the  
27 COVID-19 variables accounted for 1.8% unique variance ( $R^2_{\text{change}}=0.018$ ,  $SE=7.44$ ,  $F_{\text{change}}(3, 4777) =$   
28  $17.68$ ,  $p < .001$ ). The final model is presented in Table 8 and accounted for 38.9% of the variance in stress  
29 scores.

30 Controlling for other variables in the model, identifying as non-binary or different gender identity,  
31 Aboriginal and/or Torres Strait Islander, predicted higher stress. Being more well-educated with a trade  
32 certificate, and older age, were predictors of lower stress. Being a stay at home parent was a predictor of  
33 higher stress. Having a chronic illness, and prior history of mental health diagnosis were associated with  
34 higher stress, whereas better self-rated health was a predictor of lower stress. Increased uncertainty about the  
35 future, loneliness, and financial worries were also associated with higher stress. Of the COVID-19 variables,  
36 more hygiene behaviours, worry about loved ones contracting COVID-19, and higher perceived likelihood  
37 of contacting COVID 19 were predictors of higher stress. Higher perceived control over COVID-19  
38 predicted lower stress.

Table 8. Predictors of depression, anxiety and stress severity (DASS-21 scores)

| Variable                                        | DASS-21 Depression |      |        |       |             | DASS-21 Anxiety |      |        |       |             | DASS-21 Stress |      |        |       |             |
|-------------------------------------------------|--------------------|------|--------|-------|-------------|-----------------|------|--------|-------|-------------|----------------|------|--------|-------|-------------|
|                                                 | B                  | SE   | Exp(B) | t     | p           | B               | SE   | Exp(B) | t     | p           | B              | SE   | Exp(B) | t     | p           |
| Constant                                        | 5.51               | 1.43 |        | 3.84  | 0.00        | 1.05            | 1.23 |        | 0.85  | 0.39        | 3.87           | 1.40 |        | 2.76  | 0.01        |
| <b>Gender</b>                                   |                    |      |        |       |             |                 |      |        |       |             |                |      |        |       |             |
| Male (RC)                                       |                    |      |        |       |             |                 |      |        |       |             |                |      |        |       |             |
| Female                                          | -1.08              | 0.33 | -0.04  | -3.27 | <b>0.00</b> | 0.60            | 0.28 | 0.03   | 2.10  | <b>0.04</b> | 0.36           | 0.32 | 0.01   | 1.11  | 0.27        |
| Non-binary or different identity                | 0.57               | 1.16 | 0.01   | 0.49  | 0.62        | 1.71            | 1.00 | 0.02   | 1.71  | <b>0.09</b> | 3.69           | 1.14 | 0.04   | 3.25  | <b>0.00</b> |
| Prefer not to say                               | -0.68              | 2.33 | 0.00   | -0.29 | 0.77        | 4.60            | 2.00 | 0.03   | 2.30  | <b>0.02</b> | 3.42           | 2.27 | 0.02   | 1.50  | 0.13        |
| <b>Age</b>                                      |                    |      |        |       |             |                 |      |        |       |             |                |      |        |       |             |
| 18 to 24 (RC)                                   |                    |      |        |       |             |                 |      |        |       |             |                |      |        |       |             |
| 25-34                                           | -1.84              | 0.58 | -0.06  | -3.16 | <b>0.00</b> | -2.17           | 0.50 | -0.10  | -4.34 | <b>0.00</b> | -1.58          | 0.57 | -0.06  | -2.77 | <b>0.01</b> |
| 35-44                                           | -2.39              | 0.58 | -0.09  | -4.12 | <b>0.00</b> | -3.21           | 0.50 | -0.16  | -6.46 | <b>0.00</b> | -1.69          | 0.57 | -0.07  | -2.98 | <b>0.00</b> |
| 45-54                                           | -2.33              | 0.58 | -0.09  | -4.02 | <b>0.00</b> | -4.06           | 0.50 | -0.21  | -8.16 | <b>0.00</b> | -3.08          | 0.57 | -0.14  | -5.43 | <b>0.00</b> |
| 55-64                                           | -2.34              | 0.59 | -0.09  | -3.98 | <b>0.00</b> | -4.66           | 0.51 | -0.24  | -9.22 | <b>0.00</b> | -4.47          | 0.57 | -0.20  | -7.77 | <b>0.00</b> |
| 65-74                                           | -3.27              | 0.73 | -0.09  | -4.50 | <b>0.00</b> | -5.41           | 0.62 | -0.20  | -8.67 | <b>0.00</b> | -6.03          | 0.71 | -0.19  | -8.48 | <b>0.00</b> |
| 75 and older                                    | -3.46              | 1.30 | -0.03  | -2.66 | <b>0.01</b> | -4.82           | 1.12 | -0.06  | -4.31 | <b>0.00</b> | -6.63          | 1.27 | -0.07  | -5.22 | <b>0.00</b> |
| <b>Aboriginal and/or Torres Strait Islander</b> | 1.46               | 0.90 | 0.02   | 1.62  | 0.11        | 1.63            | 0.77 | 0.02   | 2.11  | <b>0.04</b> | 1.94           | 0.88 | 0.02   | 2.21  | <b>0.03</b> |
| <b>Education</b>                                |                    |      |        |       |             |                 |      |        |       |             |                |      |        |       |             |
| Less than high school (RC)                      |                    |      |        |       |             |                 |      |        |       |             |                |      |        |       |             |
| High school only                                | 0.08               | 0.62 | 0.00   | 0.13  | 0.90        | -0.75           | 0.53 | -0.02  | -1.41 | 0.16        | -0.70          | 0.61 | -0.02  | -1.15 | 0.25        |
| Trade certificate or diploma                    | -0.90              | 0.52 | -0.04  | -1.74 | <b>0.08</b> | -0.98           | 0.44 | -0.05  | -2.20 | <b>0.03</b> | -0.84          | 0.51 | -0.04  | -1.67 | <b>0.09</b> |
| Bachelor's degree or higher                     | -1.46              | 0.51 | -0.07  | -2.87 | <b>0.00</b> | -1.81           | 0.44 | -0.11  | -4.16 | <b>0.00</b> | -0.71          | 0.50 | -0.04  | -1.43 | 0.15        |
| <b>Employment Status</b>                        |                    |      |        |       |             |                 |      |        |       |             |                |      |        |       |             |
| Paid employment (RC)                            |                    |      |        |       |             |                 |      |        |       |             |                |      |        |       |             |
| Unemployed                                      | 0.04               | 0.55 | 0.00   | 0.07  | 0.94        | -0.41           | 0.47 | -0.01  | -0.88 | 0.38        | -0.68          | 0.54 | -0.02  | -1.26 | 0.21        |
| Student                                         | 2.26               | 0.32 | 0.08   | 7.17  | <b>0.00</b> | 1.08            | 0.27 | 0.05   | 4.00  | <b>0.00</b> | 0.15           | 0.31 | 0.01   | 0.49  | 0.63        |
| Retired                                         | 0.82               | 0.47 | 0.03   | 1.74  | <b>0.08</b> | 0.19            | 0.41 | 0.01   | 0.47  | 0.63        | -0.23          | 0.46 | -0.01  | -0.50 | 0.62        |
| At home parent                                  | 1.01               | 0.57 | 0.02   | 1.77  | <b>0.08</b> | -0.34           | 0.49 | -0.01  | -0.69 | 0.49        | 1.22           | 0.56 | 0.03   | 2.19  | <b>0.03</b> |

|                                                            |       |      |       |            |             |  |       |      |       |       |             |  |       |      |       |       |             |
|------------------------------------------------------------|-------|------|-------|------------|-------------|--|-------|------|-------|-------|-------------|--|-------|------|-------|-------|-------------|
| Carer                                                      | 1.54  | 0.71 | 0.02  | 2.18       | <b>0.03</b> |  | 0.36  | 0.61 | 0.01  | 0.59  | 0.56        |  | 0.59  | 0.69 | 0.01  | 0.85  | 0.39        |
| <b>Chronic illness</b>                                     | 0.33  | 0.19 | 0.02  | 1.72       | <b>0.08</b> |  | 0.57  | 0.17 | 0.04  | 3.44  | <b>0.00</b> |  | 0.38  | 0.19 | 0.03  | 2.01  | <b>0.04</b> |
| <b>Mental health diagnosis</b>                             | 2.23  | 0.24 | 0.10  | 9.38       | <b>0.00</b> |  | 1.88  | 0.20 | 0.11  | 9.22  | <b>0.00</b> |  | 2.51  | 0.23 | 0.13  | 10.81 | <b>0.00</b> |
| <b>Self-rated health</b>                                   | -1.40 | 0.13 | -0.13 | -<br>10.51 | <b>0.00</b> |  | -0.83 | 0.11 | -0.10 | -7.25 | <b>0.00</b> |  | -0.63 | 0.13 | -0.06 | -4.81 | <b>0.00</b> |
| <b>Uncertainty about future</b>                            | 2.07  | 0.13 | 0.21  | 15.75      | <b>0.00</b> |  | 1.26  | 0.11 | 0.16  | 11.17 | <b>0.00</b> |  | 1.96  | 0.13 | 0.22  | 15.24 | <b>0.00</b> |
| <b>Loneliness</b>                                          | 3.24  | 0.10 | 0.39  | 32.37      | <b>0.00</b> |  | 1.38  | 0.09 | 0.22  | 16.09 | <b>0.00</b> |  | 1.82  | 0.10 | 0.25  | 18.64 | <b>0.00</b> |
| <b>Worry about finances</b>                                | 0.73  | 0.10 | 0.09  | 7.04       | <b>0.00</b> |  | 0.46  | 0.09 | 0.07  | 5.19  | <b>0.00</b> |  | 0.40  | 0.10 | 0.05  | 3.95  | <b>0.00</b> |
| <b>Self-isolation</b>                                      | -0.05 | 0.23 | 0.00  | -0.23      | 0.82        |  | 0.33  | 0.20 | 0.02  | 1.66  | 0.10        |  | -0.11 | 0.23 | -0.01 | -0.50 | 0.62        |
| <b>Hygiene behaviours</b>                                  | -0.08 | 0.05 | -0.02 | -1.67      | 0.10        |  | 0.28  | 0.04 | 0.08  | 6.73  | <b>0.00</b> |  | 0.17  | 0.05 | 0.04  | 3.57  | <b>0.00</b> |
| <b>Exposure to COVID-19 information</b>                    | 0.13  | 0.21 | 0.01  | 0.61       | 0.54        |  | -0.58 | 0.18 | -0.04 | -3.16 | <b>0.00</b> |  | -0.09 | 0.21 | 0.00  | -0.43 | 0.67        |
| <b>Concern/worry about contracting COVID-19</b>            | -0.53 | 0.15 | -0.05 | -3.68      | <b>0.00</b> |  | 0.47  | 0.12 | 0.06  | 3.75  | <b>0.00</b> |  | 0.20  | 0.14 | 0.02  | 1.39  | 0.17        |
| <b>Likelihood of contracting COVID-19</b>                  | 0.01  | 0.01 | 0.03  | 2.15       | <b>0.03</b> |  | 0.00  | 0.00 | 0.01  | 1.00  | 0.32        |  | 0.01  | 0.01 | 0.03  | 2.48  | <b>0.01</b> |
| <b>Perceived control</b>                                   | -0.04 | 0.01 | -0.07 | -5.94      | <b>0.00</b> |  | -0.02 | 0.01 | -0.05 | -3.89 | <b>0.00</b> |  | -0.02 | 0.01 | -0.05 | -3.95 | <b>0.00</b> |
| <b>Severity of illness</b>                                 | 0.26  | 0.13 | 0.03  | 2.02       | <b>0.04</b> |  | 0.30  | 0.11 | 0.04  | 2.67  | <b>0.01</b> |  | -0.02 | 0.13 | 0.00  | -0.14 | 0.89        |
| <b>Concern/worry about loved ones contracting COVID-19</b> | 0.01  | 0.13 | 0.00  | 0.04       | 0.97        |  | 0.37  | 0.11 | 0.05  | 3.30  | <b>0.00</b> |  | 0.75  | 0.13 | 0.08  | 5.84  | <b>0.00</b> |

Note. B: N=4810. Unstandardized coefficient; SE: Standard error; Exp(B): Exponentiated regression coefficient; RC: Reference category.

39

## Discussion

40 This survey presents the first insight into how the COVID-19 pandemic has impacted the mental  
41 health of people living in Australia, in a sample of 5070 individuals. Rapidly disseminating an online survey  
42 enabled us to assess a large number of participants during the peak of the pandemic in Australia to identify  
43 fears and acute distress and identify the relationship between demographic and psychological predictors of  
44 mental health. While very few individuals reported that they (0.15%) or their family/friends (4.8%) had  
45 contracted COVID-19, one quarter (25.9%) of respondents were very or extremely worried about  
46 contracting COVID-19, and over half (52.7%) were very or extremely worried about their family and friends  
47 contracting COVID-19. Almost four in five participants reported that since the outbreak their mental health  
48 had worsened, with over half (55%) saying it had worsened a little, and almost a quarter of respondents  
49 (23%) saying it had worsened a lot. A small minority reported better mental health (4.8%). Results showed  
50 that many people are experiencing high levels of uncertainty about the future (80%), and half of respondents  
51 reporting moderate to extreme loneliness and worry about their financial situation. Given loneliness, social  
52 isolation, and financial stress are significant risk factors for poor mental and physical health, and risk factors  
53 for suicidal ideation [e.g., 19, 20, 30], these findings are concerning.

54 To rapidly respond to the evolving COVID-19 situation, we administered online validated self-report  
55 questionnaires rather than diagnostic interviews. It is important to note that these questionnaires assessed  
56 *symptoms* of distress during the past week and should not be taken as indicative of a 'diagnosis' of a  
57 depressive or anxiety disorder. We found higher than expected levels of acute distress based on research in  
58 China during the COVID-19 pandemic [8], and compared to normative data [22, 31]. Between 20.3-24.1%  
59 of the current sample were experiencing severe or extremely severe levels of depression, anxiety and stress,  
60 and a further 18-22% moderate symptoms. Only 38% of the current sample had normal depression, 50% had  
61 normal anxiety, and 46% had normal stress levels, whereas in the Chinese sample reported by Wang et al.  
62 [8] 64-69% had normal anxiety, stress and depression on the DASS-21. These differences may be due to the  
63 high proportion of people with pre-existing mental health diagnoses (70%) in our sample, which have been  
64 shown to be a vulnerable group [8, 10], or because of the significant proportion with a self-reported chronic  
65 illness (38%), who may be more susceptible to more severe COVID-19 disease, and therefore more



56 distressed. Having a personal history of chronic illness was a consistent predictor of higher depression,  
57 anxiety and stress, whereas better self-rated health was associated with better mental health. Compared to  
58 the Australian population, this sample appeared to have poorer health, with 30% reported being in fair or  
59 poor health (compared to 15% in the Australian population), and 30% reporting being in very good or  
70 excellent health (compared to 56% of Australians) [32].

71 Our data gave some insights into other demographic variables which predict higher psychological  
72 distress. Specific occupational factors predicted higher distress levels: student status (depression and  
73 anxiety), being an at home parent (depression and stress), a carer or retired (predicted higher depression),  
74 whereas education was associated with lower psychological distress. In contrast to past research, identifying  
75 as female predicted lower depression, however identifying as non-binary or a different gender identity was  
76 associated with higher self-reported anxiety and stress. Identifying as Aboriginal or Torres Strait Islander  
77 also predicted worse anxiety and stress levels. These groups may be particularly vulnerable during the  
78 current pandemic, and longitudinal research is needed to explore the longer term predictors of poorer mental  
79 health over time.

30 Our results confirm fears about the potential impact of the COVID-19 pandemic on people with lived  
31 experience of mental illness [7]. Participants with a self-reported history of mental health problems were  
32 more afraid of COVID-19 and more worried about their loved ones contracting COVID-19, had higher  
33 distress, depression, anxiety, health anxiety and contamination fears, and higher rates of elevated health  
34 anxiety (26% versus 11%) than those without pre-existing mental health diagnoses. Relative to those  
35 without mental health issues, a greater proportion of people with self-reported mental health problems had  
36 elevated health anxiety (26% versus 11%), and said their mental health had been ‘a lot worse’ since the  
37 outbreak (26% versus 13%). Having a history of mental health issues was a consistent predictor of higher  
38 depression, anxiety and stress.

39 Because we did not collect any information about the history and nature of these mental health  
40 diagnoses, we cannot determine whether these individuals had higher distress prior to the pandemic, or  
41 whether distress increased as a result of the pandemic, due to inability to access usual supports, social  
42 isolation or loneliness [7]. However, our findings highlight the need for proactive mental health

33 interventions for those who are experiencing elevated symptoms of depression, anxiety and stress during the  
34 current COVID-19 pandemic, regardless of whether the distress is an exacerbation or recurrence of pre-  
35 existing mental health concerns, or new onset. Digital interventions, which have been shown to be highly  
36 effective and cost-effective for depression and anxiety treatment [33] will be crucial to respond to these  
37 ongoing mental health concerns, as they have capacity to deliver high quality interventions for distress at  
38 scale, and to those in social isolation who are unable to attend face-to-face services [7, 34].

39         This study provides new knowledge about the rates of health anxiety during the COVID-19  
40 pandemic. Over one in four (26%) of people with a prior history of mental health issues, and 11% of those  
41 without pre-existing mental health issues reported elevated health anxiety in the past week, which is higher  
42 than rates of health anxiety in the general Australian population (3.4% [35]), and closer to the rates of health  
43 anxiety observed in general practice (10%) and outpatient medical clinic settings (20-25%) [36]. While these  
44 symptoms are not necessarily indicative of illness anxiety disorder, high health anxiety is likely to have  
45 significant ramifications for health service utilisation. Responses to health anxiety vary substantially, with  
46 responses ranging from a complete avoidance of doctors, hospitals, and medical settings due to fear, to the  
47 other end of the spectrum of excessive, repeated, and unnecessary health service use, diagnostic testing,  
48 emergency visits and paramedic calls [37]. Proactive treatment of health anxiety with digital interventions  
49 may also be needed should these symptoms persist [38, 39].

50         In prior research, risk perceptions, including the perceived risk of contracting the virus, perceived  
51 control over the virus, and the perceived seriousness of the symptoms have been shown to be associated with  
52 psychological distress, and behavioural responses to disease outbreaks. Consistent with the findings of  
53 SARS pandemics, and our previous study, we found moderate perceptions of risk of contracting the virus.  
54 Participants rated on average that there was a 50% likelihood of contracting the virus personally, and higher  
55 perceived risk was associate with higher depression and stress levels. In the current cohort approximately  
56 one third of participants expected COVID-19 to lead to severe symptoms (32.1%), and in some cases death  
57 (4%), which is higher than in our previous study, where we found only 25% expected severe symptoms. The  
58 expected severity of the COVID-19 illness differs markedly to the reality for most people, as studies show  
59 that 80% of people will experience no or mild symptoms [40]. These findings reinforce the need for

20 education campaigns to address these misperceptions, especially as research has shown that these beliefs are  
21 associated with engagement with distress. These risk perceptions explained a relatively small amount of  
22 variance in the regression analyses, with perceived control over COVID-19 a consistent predictor of better  
23 mental health and higher perceived severity of illness associated with higher depression and anxiety.  
24 However, it is important to note that other predictors, including loneliness, financial stress, uncertainty,  
25 demographic factors, and prior history of mental and chronic illness were stronger predictors of distress.

26  
27       Similar to Wang et al. [8], some of the most common precautionary behaviours were avoiding  
28 touching objects that had been touched by others, washing hands, and using hand sanitiser. Participants also  
29 commonly reported staying at home and avoiding social events and socialising with others outside of the  
30 household. In contrast to media portrayals of panic buying, excessive purchasing behaviour was not  
31 common. In previous research, higher engagement in hygiene behaviours, such as handwashing have been  
32 associated with lower distress and anxiety, suggesting behavioural control may be protective for mental  
33 health. However, in the current cohort we found some inconsistent results, with engagement in *more* hygiene  
34 behaviours associated with *higher* anxiety and stress levels (they were not associated with depression).  
35 These findings differ to the findings of Wang et al. [8] during the early stages of the epidemic in China,  
36 where the use of precautionary measures, such as avoiding sharing utensils, hand hygiene and wearing  
37 masks were associated with lower stress, anxiety and depression. However, the current findings are  
38 consistent with some research from the SARS epidemic, in which moderate levels of anxiety were  
39 associated with higher uptake of precautionary behaviours [41]. It is possible that the association we found  
40 was due to people who were higher in anxiety or stress using these behaviours in an attempt to control  
41 anxiety.

42       Finally, concerns have been raised about the potential impact of social isolation and quarantine on  
43 physical inactivity, as well as increased alcohol use and abuse. On the AUDIT-C brief screener for alcohol  
44 use, approximately 52.7% met criteria for hazardous drinking levels, which is higher than the 42% found in  
45 primary care samples in Australia [42] and higher than USA-based population samples (35 %-45%) [43].  
46 However it is important to note that participants with a prior experience of mental health problems had  
47 lower rates of hazardous drinking, and lower rates of inactivity. In the current sample, 42.7% met the

18 national physical activity recommendations of 150 minutes or more of moderate to vigorous activity over  
19 the past week, which are similar to the population based normative data from the Australian National Health  
20 survey (43-44%) [32]. We will be following up these participants longitudinally to explore whether activity  
21 levels decrease further as isolation restrictions proceed. Given the importance of exercise and physical  
22 activity in maintaining mental health and promoting overall health and wellbeing, interventions could be  
23 used to assist increasing activity levels for those sedentary at home.

## 24 **Limitations**

25 The results are based on a convenience sample recruited online, who were mostly women (85%) and  
26 well educated, and a significant proportion reported having lived experience of a mental health diagnosis  
27 (70%). This may overestimate the symptom severity and impact of COVID-19, especially given past studies  
28 have shown worse impact of pandemics on those with pre-existing mental illness, and in females. It may  
29 also mean that the results cannot generalise to the broader Australian population. Results are also based  
30 solely on validated self-report measures, due to their ease and speed of assessment, and administration.  
31 Conducting diagnostic interviews to assess mental health diagnoses with more than 5000 participants in 10  
32 days would not have been feasible. Future studies need to explore the impact of COVID-19 on mental health  
33 of COVID-19 patients, given evidence of increased rates of Post -Traumatic Stress Disorder, sleep  
34 disturbance and depression in SARS patients [5, 44]. Finally, the study was cross-sectional; the next step in  
35 our research is to track this cohort over time, to explore how their mental health changes as the pandemic  
36 evolves in Australia.

37

## 38 **Acknowledgements**

39 We thank all of the participants who kindly contributed to this study.

70

## References

- 71 1. World Health Organisation. *Coronavirus disease 2019 (COVID-19) Situation Report – 85* 2020;  
72 Available from: [https://www.who.int/docs/default-source/coronaviruse/situation-reports/20200414-](https://www.who.int/docs/default-source/coronaviruse/situation-reports/20200414-sitrep-85-covid-19.pdf?sfvrsn=7b8629bb_2)  
73 [sitrep-85-covid-19.pdf?sfvrsn=7b8629bb\\_2](https://www.who.int/docs/default-source/coronaviruse/situation-reports/20200414-sitrep-85-covid-19.pdf?sfvrsn=7b8629bb_2).
- 74 2. Harvey, S.B., et al., *Expected impact of COVID-19 on the mental health of health professionals. A*  
75 *systematic review and meta-analysis of studies from the current and previous pandemics.* under  
76 review.
- 77 3. Chua, S.E., et al., *Stress and psychological impact on SARS patients during the outbreak.* Can J  
78 Psychiatry, 2004. **49**(6): p. 385-90.
- 79 4. Chua, S.E., et al., *Psychological effects of the SARS outbreak in Hong Kong on high-risk health care*  
80 *workers.* Can J Psychiatry, 2004. **49**(6): p. 391-3.
- 81 5. Mak, I.W.C., et al., *Long-term psychiatric morbidities among SARS survivors.* General Hospital  
82 Psychiatry, 2009. **31**(4): p. 318-326.
- 83 6. Phua, D.H., H.K. Tang, and K.Y. Tham, *Coping responses of emergency physicians and nurses to*  
84 *the 2003 severe acute respiratory syndrome outbreak.* Acad Emerg Med, 2005. **12**(4): p. 322-8.
- 85 7. Holmes, E.A., et al., *Multidisciplinary research priorities for the COVID-19 pandemic: a call for*  
86 *action for mental health science.* The Lancet Psychiatry.
- 87 8. Wang, C., et al., *Immediate Psychological Responses and Associated Factors during the Initial Stage*  
88 *of the 2019 Coronavirus Disease (COVID-19) Epidemic among the General Population in China.* Int  
89 J Environ Res Public Health, 2020. **17**(5).
- 90 9. Zhang, Y. and Z.F. Ma, *Impact of the COVID-19 Pandemic on Mental Health and Quality of Life*  
91 *among Local Residents in Liaoning Province, China: A Cross-Sectional Study.* International Journal  
92 of Environmental Research and Public Health, 2020. **17**: p. 2381.
- 93 10. Qiu, J., et al., *A nationwide survey of psychological distress among Chinese people in the COVID-19*  
94 *epidemic: implications and policy recommendations.* General Psychiatry, 2020. **33**(2): p. e100213.
- 95 11. Lai, J., et al., *Factors Associated With Mental Health Outcomes Among Health Care Workers*  
96 *Exposed to Coronavirus Disease 2019.* JAMA Network Open, 2020. **3**(3): p. e203976-e203976.
- 97 12. Wang, C., et al., *A longitudinal study on the mental health of general population during the COVID-*  
98 *19 epidemic in China.* Brain Behav Immun, 2020.
- 99 13. Huang, Y. and N. Zhao, *Generalized anxiety disorder, depressive symptoms and sleep quality during*  
100 *COVID-19 epidemic in China: a web-based cross-sectional survey.* medRxiv, 2020: p.  
101 2020.02.19.20025395.
- 102 14. Faasse, K. and J.M. Newby, *Public perceptions of COVID-19 in Australia: perceived risk,*  
103 *knowledge, health-protective behaviours, and vaccine intentions.* under review.
- 104 15. Blakey, S.M. and J.S. Abramowitz, *Psychological Predictors of Health Anxiety in Response to the*  
105 *Zika Virus.* Journal of clinical psychology in medical settings, 2017. **24**(3-4): p. 270-278.
- 106 16. Wheaton, M.G., et al., *Psychological predictors of anxiety in response to the H1N1 (swine flu)*  
107 *pandemic.* Cognitive Therapy and Research, 2012. **36**(3): p. 210-218.
- 108 17. Asmundson, G.J.G. and S. Taylor, *Coronaphobia: Fear and the 2019-nCoV outbreak.* J Anxiety  
109 Disord, 2020. **70**: p. 102196.
- 110 18. Asmundson, G.J.G. and S. Taylor, *How health anxiety influences responses to viral outbreaks like*  
111 *COVID-19: What all decision-makers, health authorities, and health care professionals need to*  
112 *know.* J Anxiety Disord, 2020. **71**: p. 102211.
- 113 19. Beutel, M.E., et al., *Loneliness in the general population: prevalence, determinants and relations to*  
114 *mental health.* BMC Psychiatry, 2017. **17**(1): p. 97.
- 115 20. Cacioppo, J.T., et al., *Loneliness as a specific risk factor for depressive symptoms: cross-sectional*  
116 *and longitudinal analyses.* Psychol Aging, 2006. **21**(1): p. 140-51.
- 117 21. Glonti, K., et al., *A systematic review on health resilience to economic crises.* PLoS One, 2015.  
118 **10**(4): p. e0123117.
- 119 22. Lovibond, S.H. and P.F. Lovibond, *Manual for the Depression Anxiety Stress Scales.* 2nd ed. 1995,  
120 Sydney: Psychology Foundation.

- 70 23. Asmundson, G.J.R., et al., *Comparison of unitary and multidimensional models of the Whiteley Index*  
71 *in a nonclinical sample: implications for understanding and assessing health anxiety*. Journal of  
72 Cognitive Psychotherapy, 2008. **22**(2): p. 87-96.
- 73 24. Burns, G.L., et al., *Revision of the Padua Inventory of obsessive compulsive disorder symptoms:*  
74 *Distinctions between worry, obsessions, and compulsions*. Behaviour Research and Therapy, 1996.  
75 **34**(2): p. 163-173.
- 76 25. Bults, M., et al., *Perceived risk, anxiety, and behavioural responses of the general public during the*  
77 *early phase of the Influenza A (H1N1) pandemic in the Netherlands: results of three consecutive*  
78 *online surveys*. BMC Public Health, 2011. **11**: p. 2.
- 79 26. Bults, M., et al., *Perceptions and behavioral responses of the general public during the 2009*  
80 *influenza A (H1N1) pandemic: a systematic review*. Disaster Med Public Health Prep, 2015. **9**(2): p.  
81 207-19.
- 82 27. Greenwood, J.L.J., E.A. Joy, and J. Stanford, *The physical activity vital sign: a primary care tool to*  
83 *guide counseling for obesity*. Journal of Physical Activity and Health, 2010. **7**(5): p. 571-576.
- 84 28. Bush, K., et al., *The AUDIT alcohol consumption questions (AUDIT-C): an effective brief screening*  
85 *test for problem drinking*. Archives of Internal Medicine, 1998. **158**(16): p. 1789-1795.
- 86 29. Bradley, K.A., et al., *AUDIT-C as a brief screen for alcohol misuse in primary care*. Alcohol Clin  
87 Exp Res, 2007. **31**(7): p. 1208-17.
- 88 30. Barr, B., et al., *Suicides associated with the 2008-10 economic recession in England: time trend*  
89 *analysis*. BMJ : British Medical Journal, 2012. **345**: p. e5142.
- 90 31. Crawford, J.R. and J.D. Henry, *The Depression Anxiety Stress Scales (DASS): normative data and*  
91 *latent structure in a large non-clinical sample*. Br J Clin Psychol, 2003. **42**(Pt 2): p. 111-31.
- 92 32. Australian Bureau of Statistics, *National Health Survey: First Results, 2014-15*. 2014: Canberra.
- 93 33. Andrews, G., et al., *Computer therapy for the anxiety and depression disorders is effective,*  
94 *acceptable and practical health care: An updated meta-analysis*. Journal of Anxiety Disorders, 2018.  
95 **55**: p. 70-78.
- 96 34. Wind, T.R., et al., *The COVID-19 pandemic: The 'black swan' for mental health care and a turning*  
97 *point for e-health*. Internet interventions, 2020. **20**: p. 100317-100317.
- 98 35. Sunderland, M., J.M. Newby, and G. Andrews, *Health anxiety in Australia: prevalence, comorbidity,*  
99 *disability and service use*. British Journal of Psychiatry, 2013. **202**(1): p. 56-61.
- 100 36. Tyrer, P., et al., *Prevalence of health anxiety problems in medical clinics*. Journal of Psychosomatic  
101 Research, 2011. **71**(6): p. 392-394.
- 102 37. American Psychiatric, A., *Diagnostic and statistical manual of mental disorders : DSM-5*. 2013,  
103 Arlington, VA: American Psychiatric Association.
- 104 38. Newby, J.M., et al. *Internet-based cognitive behavioral therapy versus psychoeducation control for*  
105 *illness anxiety disorder and somatic symptom disorder: A randomized controlled trial*. 2018.
- 106 39. Hedman, E., et al., *Exposure-based cognitive-behavioural therapy via the internet and as*  
107 *bibliotherapy for somatic symptom disorder and illness anxiety disorder: randomised controlled*  
108 *trial*. Br J Psychiatry, 2016. **209**(5): p. 407-413.
- 109 40. Wu, Z. and J.M. McGoogan, *Characteristics of and Important Lessons From the Coronavirus*  
110 *Disease 2019 (COVID-19) Outbreak in China: Summary of a Report of 72 314 Cases From the*  
111 *Chinese Center for Disease Control and Prevention*. JAMA, 2020. **323**(13): p. 1239-1242.
- 112 41. Leung, G.M., et al., *The impact of community psychological responses on outbreak control for*  
113 *severe acute respiratory syndrome in Hong Kong*. J Epidemiol Community Health, 2003. **57**(11): p.  
114 857-63.
- 115 42. Hobden, B., et al., *Do rates of depression vary by level of alcohol misuse in Australian general*  
116 *practice? %J Australian Journal of Primary Health*. 2017. **23**(3): p. 263-267.
- 117 43. Delaney, K.E., et al., *Inconsistencies between alcohol screening results based on AUDIT-C scores*  
118 *and reported drinking on the AUDIT-C questions: prevalence in two US national samples*. Addiction  
119 Science & Clinical Practice, 2014. **9**(1): p. 2.
- 120 44. Moldofsky, H. and J. Patcai, *Chronic widespread musculoskeletal pain, fatigue, depression and*  
121 *disordered sleep in chronic post-SARS syndrome; a case-controlled study*. BMC Neurol, 2011. **11**: p.  
122 37.

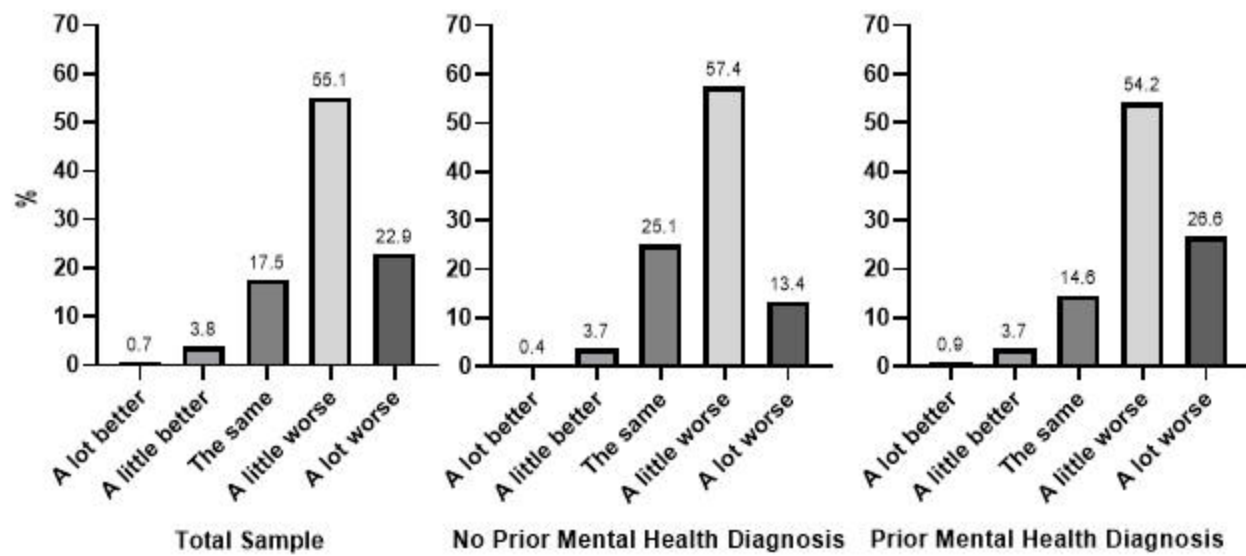

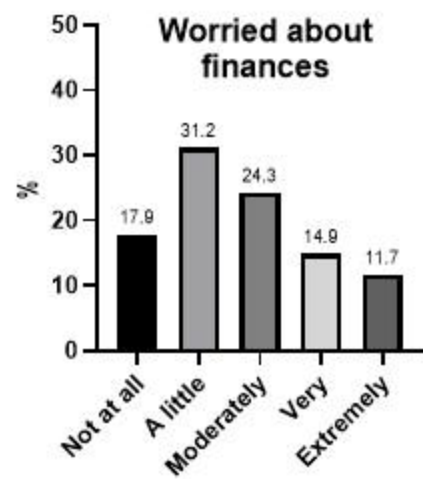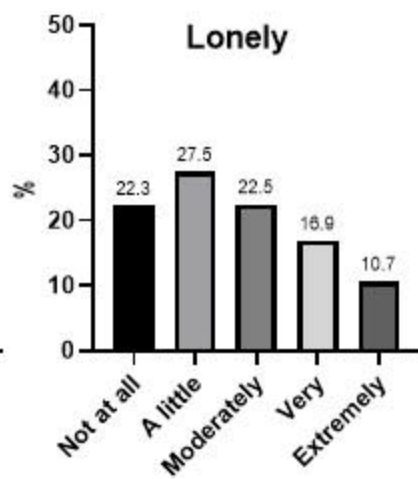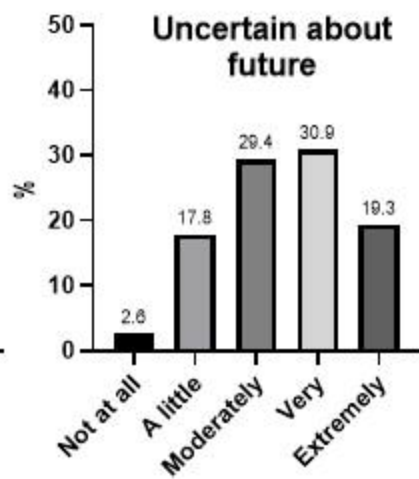

Source: https://medrxiv.org/content/medrxiv/early/2020/05/08/2020.05.03.20089961.full.pdf
